# Supplementary material
Source: PubMed Central journal article supplement (PMC6132266)
Supplement: NIHMS968045-supplement-supplement_1.pdf [file NIHMS968045-supplement-supplement_1.pdf]

## **SUPPLEMENTAL MATERIAL**

## **FIGURE LEGENDS**

**Supplemental Figure 1. Plot of the principal component analysis of CARDIA AA cases along with individuals from the 1,000 Genomes Project.**

AMR-Ad Mixed American; SAS-South Asian; EAS-East Asian; EUR-European; ACB-African Caribbeans in Barbados; ASW-Americans of African Ancestry in SW USA; AFR-African.

**Supplemental Figure 2. Plot of the principal component analysis of BioVU AA cases along with individuals from the 1,000 Genomes Project.**

AMR-Ad Mixed American; SAS-South Asian; EAS-East Asian; EUR-European; ACB-African Caribbeans in Barbados; ASW-Americans of African Ancestry in SW USA; AFR-African.

**Supplemental Figure 3. Plot of the principal component analysis of CARDIA AA cases along with individuals from the 1,000 Genomes Project.**

AMR-Ad Mixed American; SAS-South Asian; EAS-East Asian; AFR-African; EUR-European.

**Supplemental Figure 4. Plot of the principal component analysis of BioVU AA cases along with individuals from the 1,000 Genomes Project.**

AMR-Ad Mixed American; SAS-South Asian; EAS-East Asian; AFR-African; EUR-European.

**Supplemental Figure 5. The QQ plot for the meta-analysis results from the GWAS for number of fibroids (single vs multiple) for BioVU and CARDIA AAs.**

The regression analyses were adjusted for age, BMI, and five principal components. Markers with a MAF of at least 5% were used in the analyses.

**Supplemental Figure 6. The QQ plot for the meta-analysis results from the GWAS for  $\log_{10}$  transformed largest dimension of all fibroids for BioVU and CARDIA AAs.**

The regression analyses were adjusted for age, BMI, and five principal components. Markers with a MAF of at least 5% were used in the analyses.

**Supplemental Figure 7. The QQ plot for the meta-analysis results from the GWAS for  $\log_{10}$  transformed fibroid volume for BioVU and CARDIA AAs.**

The regression analyses were adjusted for age, BMI, and five principal components. Markers with a MAF of at least 5% were used in the analyses.

**Supplemental Figure 8. The QQ plot for the meta-analysis results from the GWAS for number of fibroids (single vs multiple) for BioVU and CARDIA EAs.**

The regression analyses were adjusted for age, BMI, and five principal components. Markers with a MAF of at least 5% were used in the analyses.

**Supplemental Figure 9. The QQ plot for the meta-analysis results from the GWAS for  $\log_{10}$  transformed largest dimension of all fibroids for BioVU and CARDIA EAs.**

The regression analyses were adjusted for age, BMI, and five principal components. Markers with a MAF of at least 5% were used in the analyses.

**Supplemental Figure 10. The QQ plot for the meta-analysis results from the GWAS for  $\log_{10}$  transformed fibroid volume for BioVU and CARDIA EAs.**

The regression analyses were adjusted for age, BMI, and five principal components. Markers with a MAF of at least 5% were used in the analyses.

**Supplemental Figure 11. The QQ plot for the transethnic meta-analysis results from the GWAS for number of fibroids (single vs multiple) for BioVU and CARDIA AAs and EAs.**

The regression analyses were adjusted for age, BMI, and five principal components. Markers with a MAF of at least 5% were used in the analyses.

**Supplemental Figure 12. The QQ plot for the transethnic meta-analysis results from the GWAS for  $\log_{10}$  transformed largest dimension of all fibroids for BioVU and CARDIA AAs and EAs.**

The regression analyses were adjusted for age, BMI, and five principal components. Markers with a MAF of at least 5% were used in the analyses.

**Supplemental Figure 13. The QQ plot for the transethnic meta-analysis results from the GWAS for  $\log_{10}$  transformed fibroid volume for BioVU and CARDIA AAs and EAs.**

The regression analyses were adjusted for age, BMI, and five principal components. Markers with a MAF of at least 5% were used in the analyses.

**Supplemental Figure 14. The manhattan plot for the meta-analysis results from the GWAS for number of fibroids (single vs multiple) for BioVU and CARDIA AAs.**

The regression analyses were adjusted for age, BMI, and five principal components. Markers with a MAF of at least 5% were used in the analyses.

**Supplemental Figure 15. The manhattan plot for the meta-analysis results from the GWAS for  $\log_{10}$  transformed largest dimension of all fibroids for BioVU and CARDIA AAs.**

The regression analyses were adjusted for age, BMI, and five principal components. Markers with a MAF of at least 5% were used in the analyses.

**Supplemental Figure 16. The manhattan plot for the meta-analysis results from the GWAS for  $\log_{10}$  transformed fibroid volume for BioVU and CARDIA AAs.**

The regression analyses were adjusted for age, BMI, and five principal components. Markers with a MAF of at least 5% were used in the analyses.

**Supplemental Figure 17. The manhattan plot for the meta-analysis results from the GWAS for number of fibroids (single vs multiple) for BioVU and CARDIA EAs.**

The regression analyses were adjusted for age, BMI, and five principal components. Markers with a MAF of at least 5% were used in the analyses.

**Supplemental Figure 18. The manhattan plot for the meta-analysis results from the GWAS for  $\log_{10}$  transformed largest dimension of all fibroids for BioVU and CARDIA EAs.**

The regression analyses were adjusted for age, BMI, and five principal components. Markers with a MAF of at least 5% were used in the analyses.

**Supplemental Figure 19. The manhattan plot for the meta-analysis results from the GWAS for  $\log_{10}$  transformed fibroid volume for BioVU and CARDIA EAs.**

The regression analyses were adjusted for age, BMI, and five principal components. Markers with a MAF of at least 5% were used in the analyses.

**Supplemental Figure 20. The manhattan plot for the transethnic meta-analysis results from the GWAS for number of fibroids (single vs multiple) for BioVU and CARDIA AAs and EAs.**

The regression analyses were adjusted for age, BMI, and five principal components. Markers with a MAF of at least 5% were used in the analyses.

**Supplemental Figure 21. The manhattan plot for the transethnic meta-analysis results from the GWAS for  $\log_{10}$  transformed largest dimension of all fibroids for BioVU and CARDIA AAs and EAs.**

The regression analyses were adjusted for age, BMI, and five principal components. Markers with a MAF of at least 5% were used in the analyses.

**Supplemental Figure 22. The manhattan plot for the transethnic meta-analysis results from the GWAS for  $\log_{10}$  transformed fibroid volume for BioVU and CARDIA AAs and EAs.**

The regression analyses were adjusted for age, BMI, and five principal components. Markers with a MAF of at least 5% were used in the analyses.

**Supplemental Figure 23. The MetaXcan plot for the meta-analysis results from the GWAS for number of fibroids (single vs multiple) for BioVU and CARDIA AAs.**

The regression analyses were adjusted for age, BMI, and five principal components. Markers with a MAF of at least 5% were used in the analyses.

**Supplemental Figure 24. The MetaXcan plot for the meta-analysis results from the GWAS for  $\log_{10}$  transformed largest dimension of all fibroids for BioVU and CARDIA AAs.**

The regression analyses were adjusted for age, BMI, and five principal components. Markers with a MAF of at least 5% were used in the analyses.

**Supplemental Figure 25. The MetaXcan plot for the meta-analysis results from the GWAS for  $\log_{10}$  transformed fibroid volume for BioVU and CARDIA AAs.**

The regression analyses were adjusted for age, BMI, and five principal components. Markers with a MAF of at least 5% were used in the analyses.

**Supplemental Figure 26. The MetaXcan plot for the meta-analysis results from the GWAS for number of fibroids (single vs multiple) for BioVU and CARDIA EAs.**

The regression analyses were adjusted for age, BMI, and five principal components. Markers with a MAF of at least 5% were used in the analyses.

**Supplemental Figure 27. The MetaXcan plot for the meta-analysis results from the GWAS for  $\log_{10}$  transformed largest dimension of all fibroids for BioVU and CARDIA EAs.**

The regression analyses were adjusted for age, BMI, and five principal components. Markers with a MAF of at least 5% were used in the analyses.

**Supplemental Figure 28. The MetaXcan plot for the meta-analysis results from the GWAS for  $\log_{10}$  transformed fibroid volume for BioVU and CARDIA EAs.**

The regression analyses were adjusted for age, BMI, and five principal components. Markers with a MAF of at least 5% were used in the analyses.

**Supplemental Figure 29. The MetaXcan plot for the transethnic meta-analysis results from the GWAS for number of fibroids (single vs multiple) for BioVU and CARDIA AAs and EAs.**

The regression analyses were adjusted for age, BMI, and five principal components. Markers with a MAF of at least 5% were used in the analyses.

**Supplemental Figure 30. The MetaXcan plot for the transethnic meta-analysis results from the GWAS for  $\log_{10}$  transformed largest dimension of all fibroids for BioVU and CARDIA AAs and EAs.**

The regression analyses were adjusted for age, BMI, and five principal components. Markers with a MAF of at least 5% were used in the analyses.

**Supplemental Figure 31. The MetaXcan plot for the transethnic meta-analysis results from the GWAS for  $\log_{10}$  transformed fibroid volume for BioVU and CARDIA AAs and EAs.**

The regression analyses were adjusted for age, BMI, and five principal components. Markers with a MAF of at least 5% were used in the analyses.

**Figure 32. Regional association plot of the most significant marker from the EA meta-analyses.**

The index SNP from this regional plot is rs141745233 from the EA meta-analysis of fibroid volume. European individuals from the 1000 genomes was used to estimate linkage disequilibrium (LD) for this plot. The X-axis represents the genomic position along each chromosome in megabases (Mb). The Y-axis represents both the  $-\log_{10}$  P-values for each SNP as

well as the recombination rate. The color of each SNP represents the strength of the correlation ( $r^2$ ) to the index SNP (purple). Nearby genes are listed below the regional plots.

**Figure 33. Regional association plot of the most significant marker from the transethnic meta-analyses using African individuals from the 1000 genomes to estimate linkage disequilibrium (LD).**

(a) The index SNP from this regional plot is rs6605005 from the transethnic meta-analysis of fibroid volume. The X-axis represents the genomic position along each chromosome in megabases (Mb). The Y-axis represents both the  $-\log_{10}$  P-values for each SNP as well as the recombination rate. The color of each SNP represents the strength of the correlation ( $r^2$ ) to the index SNP (purple). Nearby genes are listed below the regional plots.

**Figure 34. Regional association plot of the most significant marker from the transethnic meta-analyses using European individuals from the 1000 genomes to estimate linkage disequilibrium (LD).**

The index SNP from this regional plot is rs6605005 from the transethnic meta-analysis of fibroid volume. The X-axis represents the genomic position along each chromosome in megabases (Mb). The Y-axis represents both the  $-\log_{10}$  P-values for each SNP as well as the recombination rate. The color of each SNP represents the strength of the correlation ( $r^2$ ) to the index SNP (purple). Nearby genes are listed below the regional plots.



**Supplemental Table 1. Quality control (QC) details for each study**

| <b>Cohort</b> | <b>Race</b> | <b>Genotyping Platform</b> | <b>Post-QC, Pre-imputation SNPs</b> | <b>Outcome</b> | <b>Post Imputation SNPs</b> |
|---------------|-------------|----------------------------|-------------------------------------|----------------|-----------------------------|
| BioVU         | AA          | Affymetrix Axiom           | 1,345,099                           | Number         | 9,530,809                   |
|               |             | Biobank Array & Axiom      |                                     | Max Dimension  | 9,526,536                   |
|               |             | World Array 3 Platform     |                                     | Volume         | 9,540,688                   |
|               | EA          | Affymetrix Axiom           | 602,522                             | Number         | 6,942,486                   |
|               |             | Biobank Array              |                                     | Max Dimension  | 6,945,186                   |
|               |             |                            |                                     | Volume         | 6,949,297                   |
| CARDIA        | AA          | Affymetrix 6.0 Array       | 784,270                             | Number         | 9,627,525                   |
|               |             |                            |                                     | Max Dimension  | 9,596,033                   |
|               |             |                            |                                     | Volume         | 9,597,202                   |
|               | EA          | Affymetrix 6.0 Array       | 562,358                             | Number         | 6,938,376                   |
|               |             |                            |                                     | Max Dimension  | 6,953,394                   |
|               |             |                            |                                     | Volume         | 6,956,705                   |

AA - African American; EA - European American

**Supplemental Table 2. Summary of cohort-specific single SNP signals from the meta-analyses between BioVU and CARDIA blacks for each fibroid outcome**

| <b>Number</b>                |                      |                       |            |             |
|------------------------------|----------------------|-----------------------|------------|-------------|
| <b>rs35322806 in 4q32.1</b>  |                      |                       |            |             |
| <b>Cohort</b>                | <b>OR [95% CI]</b>   | <b>P-value</b>        | <b>EAF</b> | <b>Info</b> |
| BioVU AA                     | 0.49 [0.34, 0.70]    | 9.85x10 <sup>-5</sup> | 0.21       | 0.97        |
| CARDIA AA                    | 0.31 [0.17, 0.59]    | 3.31x10 <sup>-4</sup> | 0.20       | 0.99        |
| <b>rs735658 in 17q25.3</b>   |                      |                       |            |             |
| <b>Cohort</b>                | <b>OR [95% CI]</b>   | <b>P-value</b>        | <b>EAF</b> | <b>Info</b> |
| BioVU AA                     | 0.39 [0.23, 0.67]    | 7.23x10 <sup>-4</sup> | 0.09       | 0.83        |
| CARDIA AA                    | 0.09 [0.03, 0.27]    | 1.29x10 <sup>-5</sup> | 0.08       | 0.67        |
| <b>rs7625080 in 3p26.1</b>   |                      |                       |            |             |
| <b>Cohort</b>                | <b>OR [95% CI]</b>   | <b>P-value</b>        | <b>EAF</b> | <b>Info</b> |
| BioVU AA                     | 0.52 [0.38, 0.69]    | 1.11x10 <sup>-5</sup> | 0.34       | 0.98        |
| CARDIA AA                    | 0.56 [0.34, 0.93]    | 0.0257                | 0.34       | 0.97        |
| <b>rs62203867 in 20p12.3</b> |                      |                       |            |             |
| <b>Cohort</b>                | <b>OR [95% CI]</b>   | <b>P-value</b>        | <b>EAF</b> | <b>Info</b> |
| BioVU AA                     | 0.48 [0.34, 0.67]    | 1.82x10 <sup>-5</sup> | 0.24       | 0.97        |
| CARDIA AA                    | 0.41 [0.20, 0.85]    | 0.0169                | 0.22       | 0.81        |
| <b>Max Dimension</b>         |                      |                       |            |             |
| <b>rs57542984 in 5q34</b>    |                      |                       |            |             |
| <b>Cohort</b>                | <b>Beta [95% CI]</b> | <b>P-value</b>        | <b>EAF</b> | <b>Info</b> |
| BioVU AA                     | 0.13 [0.08, 0.19]    | 1.66x10 <sup>-6</sup> | 0.80       | 0.91        |
| CARDIA AA                    | 0.12 [0.05, 0.18]    | 3.37x10 <sup>-4</sup> | 0.83       | 0.91        |
| <b>rs62484733 in 7q22.3</b>  |                      |                       |            |             |
| <b>Cohort</b>                | <b>Beta [95% CI]</b> | <b>P-value</b>        | <b>EAF</b> | <b>Info</b> |
| BioVU AA                     | 0.11 [0.04, 0.18]    | 1.94x10 <sup>-3</sup> | 0.10       | 0.92        |
| CARDIA AA                    | 0.17 [0.09, 0.25]    | 3.14x10 <sup>-5</sup> | 0.09       | 0.88        |
| <b>rs13183849 in 5q14.3</b>  |                      |                       |            |             |
| <b>Cohort</b>                | <b>Beta [95% CI]</b> | <b>P-value</b>        | <b>EAF</b> | <b>Info</b> |
| BioVU AA                     | -0.10 [-0.15, -0.06] | 1.59x10 <sup>-5</sup> | 0.31       | 0.97        |
| CARDIA AA                    | -0.07 [-0.12, -0.02] | 0.0105                | 0.27       | 0.99        |
| <b>Volume</b>                |                      |                       |            |             |
| <b>rs6938199 in 6q22.33</b>  |                      |                       |            |             |
| <b>Cohort</b>                | <b>Beta [95% CI]</b> | <b>P-value</b>        | <b>EAF</b> | <b>Info</b> |
| BioVU AA                     | -0.35 [-0.55, -0.14] | 8.39x10 <sup>-4</sup> | 0.10       | 1.00        |
| CARDIA AA                    | -0.49 [-0.74, -0.25] | 8.86x10 <sup>-5</sup> | 0.11       | 1.00        |

OR-odds ratio; CI-confidence interval; EAF-effect allele frequency.

**Supplemental Table 3. Summary of most significant SNPs from the meta-analyses between BioVU and CARDIA EAs for each fibroid outcome**

| Number      |         |             |                      |       |      |                      |                       |        |      |
|-------------|---------|-------------|----------------------|-------|------|----------------------|-----------------------|--------|------|
| SNP         | Region  | BP          | Genes                | A2/A1 | EAF  | OR [95% CI]          | P-value               | Het. P | Dir. |
| rs35071394  | 14q21.1 | 41,837,615  | <i>FBXO33//LRFN5</i> | C/CCT | 0.92 | 2.93 [1.92, 4.48]    | 6.56x10 <sup>-7</sup> | 0.308  | ++   |
| rs1392505   | 16q21   | 59,746,130  | <i>GOT2//CDH8</i>    | A/G   | 0.80 | 1.89 [1.46,2.44]     | 1.00x10 <sup>-6</sup> | 0.291  | ++   |
| Volume      |         |             |                      |       |      |                      |                       |        |      |
| SNP         | Region  | BP          | Genes                | A2/A1 | EAF  | Beta [95% CI]        | P-value               | Het. P | Dir. |
| rs141745233 | 7q36.1  | 148,269,774 | <i>CNTNAP2//CUL1</i> | T/TG  | 0.09 | -0.46 [-0.64, -0.29] | 3.97x10 <sup>-7</sup> | 0.227  | --   |
| rs17506409  | 5q22.1  | 110,089,908 | <i>SLC25A46</i>      | G/A   | 0.08 | 0.46 [0.28, 0.64]    | 8.10x10 <sup>-7</sup> | 0.339  | ++   |

SNP-single nucleotide polymorphism; BP-base pairs; A2-effect allele; A1-reference allele; OR-odds ratio; CI-confidence interval; Het. P-heterogeneity p-value; Dir.-direction.

**Supplemental Table 4. Summary of cohort-specific single SNP signals from the meta-analyses between BioVU and CARDIA whites for each fibroid outcome**

| <b>Number</b>                |                      |                       |            |             |
|------------------------------|----------------------|-----------------------|------------|-------------|
| <b>rs35071394 in 14q21.1</b> |                      |                       |            |             |
| <b>Cohort</b>                | <b>OR [95% CI]</b>   | <b>P-value</b>        | <b>EAF</b> | <b>Info</b> |
| BioVU EA                     | 3.17 [2.02, 4.97]    | 4.93x10 <sup>-7</sup> | 0.91       | 0.74        |
| CARDIA EA                    | 1.57 [0.44, 5.60]    | 0.484                 | 0.94       | 0.66        |
| <b>rs1392505 in 16q21</b>    |                      |                       |            |             |
| <b>Cohort</b>                | <b>OR [95% CI]</b>   | <b>P-value</b>        | <b>EAF</b> | <b>Info</b> |
| BioVU EA                     | 1.78 [1.35, 2.35]    | 4.55x10 <sup>-5</sup> | 0.80       | 0.95        |
| CARDIA EA                    | 2.60 [1.36, 4.97]    | 3.73x10 <sup>-3</sup> | 0.80       | 0.94        |
| <b>Volume</b>                |                      |                       |            |             |
| <b>rs141745233 in 7q36.1</b> |                      |                       |            |             |
| <b>Cohort</b>                | <b>Beta [95% CI]</b> | <b>P-value</b>        | <b>EAF</b> | <b>Info</b> |
| BioVU EA                     | -0.54 [-0.75, -0.32] | 9.60x10 <sup>-7</sup> | 0.09       | 1.00        |
| CARDIA EA                    | -0.30 [-0.62, 0.03]  | 0.0755                | 0.09       | 0.66        |
| <b>rs17506409 in 5q22.1</b>  |                      |                       |            |             |
| <b>Cohort</b>                | <b>Beta [95% CI]</b> | <b>P-value</b>        | <b>EAF</b> | <b>Info</b> |
| BioVU EA                     | 0.53 [0.30, 0.77]    | 1.04x10 <sup>-5</sup> | 0.07       | 0.99        |
| CARDIA EA                    | 0.35 [0.07, 0.64]    | 0.0159                | 0.08       | 1.00        |

OR-odds ratio; CI-confidence interval; EAF-effect allele frequency.

**Table 5. Summary of cohort-specific single SNP signals from the transethnic meta-analyses between all BioVU and CARDIA women for each fibroid outcome**

| <b>Number</b>                |                      |                       |            |             |
|------------------------------|----------------------|-----------------------|------------|-------------|
| <b>rs55964111 in 15q15.3</b> |                      |                       |            |             |
| <b>Cohort</b>                | <b>OR [95% CI]</b>   | <b>P-value</b>        | <b>EAF</b> | <b>Info</b> |
| BioVU AA                     | 1.88 [1.39, 2.55]    | 4.14x10 <sup>-5</sup> | 0.60       | 0.98        |
| CARDIA AA                    | 1.99 [1.18, 3.37]    | 0.0104                | 0.63       | 0.98        |
| BioVU EA                     | 1.32 [0.85, 2.04]    | 0.215                 | 0.92       | 0.85        |
| CARDIA EA                    | 3.20 [1.23, 8.35]    | 0.0173                | 0.91       | 0.80        |
| <b>rs1419784 in 7p14.3</b>   |                      |                       |            |             |
| <b>Cohort</b>                | <b>OR [95% CI]</b>   | <b>P-value</b>        | <b>EAF</b> | <b>Info</b> |
| BioVU AA                     | 1.50 [1.11, 2.02]    | 8.44x10 <sup>-3</sup> | 0.68       | 0.99        |
| CARDIA AA                    | 1.06 [0.61, 1.82]    | 0.847                 | 0.67       | 0.97        |
| BioVU EA                     | 1.57 [1.23, 2.01]    | 2.73x10 <sup>-4</sup> | 0.77       | 0.99        |
| CARDIA EA                    | 2.31 [1.29, 4.11]    | 4.61x10 <sup>-3</sup> | 0.77       | 0.97        |
| <b>Max Dimension</b>         |                      |                       |            |             |
| <b>rs7751006 in 6q27</b>     |                      |                       |            |             |
| <b>Cohort</b>                | <b>Beta [95% CI]</b> | <b>P-value</b>        | <b>EAF</b> | <b>Info</b> |
| BioVU AA                     | 0.06 [0.00, 0.12]    | 0.0467                | 0.84       | 0.89        |
| CARDIA AA                    | 0.07 [0.00, 0.15]    | 0.0622                | 0.87       | 0.73        |
| BioVU EA                     | 0.07 [0.02, 0.11]    | 2.31x10 <sup>-3</sup> | 0.66       | 0.95        |
| CARDIA EA                    | 0.09 [0.03, 0.14]    | 1.47x10 <sup>-3</sup> | 0.68       | 0.94        |
| <b>rs11185550 in 4p16.1</b>  |                      |                       |            |             |
| <b>Cohort</b>                | <b>Beta [95% CI]</b> | <b>P-value</b>        | <b>EAF</b> | <b>Info</b> |
| BioVU AA                     | -0.04 [-0.10, 0.01]  | 0.138                 | 0.13       | 0.98        |
| CARDIA AA                    | -0.10 [-0.17, -0.03] | 2.73x10 <sup>-3</sup> | 0.12       | 0.99        |
| BioVU EA                     | -0.06 [-0.12, 0.00]  | 0.0605                | 0.13       | 0.95        |
| CARDIA EA                    | -0.14 [-0.21, -0.07] | 1.54x10 <sup>-4</sup> | 0.13       | 1.00        |
| <b>Volume</b>                |                      |                       |            |             |
| <b>rs6605005 in 1q31.1</b>   |                      |                       |            |             |
| <b>Cohort</b>                | <b>Beta [95% CI]</b> | <b>P-value</b>        | <b>EAF</b> | <b>Info</b> |
| BioVU AA                     | 0.30 [0.16, 0.44]    | 1.96x10 <sup>-6</sup> | 0.75       | 1.00        |
| CARDIA AA                    | 0.17 [0.01, 0.33]    | 0.0419                | 0.74       | 0.95        |
| BioVU EA                     | 0.40 [0.19, 0.62]    | 2.76x10 <sup>-4</sup> | 0.91       | 1.00        |
| CARDIA EA                    | 0.02 [-0.23, 0.27]   | 0.886                 | 0.87       | 0.75        |
| <b>rs10024805 in 4q35.1</b>  |                      |                       |            |             |
| <b>Cohort</b>                | <b>Beta [95% CI]</b> | <b>P-value</b>        | <b>EAF</b> | <b>Info</b> |
| BioVU AA                     | 0.22 [0.09, 0.35]    | 9.12x10 <sup>-4</sup> | 0.36       | 1.00        |
| CARDIA AA                    | 0.16 [0.02, 0.29]    | 0.0222                | 0.39       | 1.00        |
| BioVU EA                     | 0.12 [-0.03, 0.26]   | 0.113                 | 0.29       | 0.99        |
| CARDIA EA                    | 0.29 [0.13, 0.46]    | 3.52x10 <sup>-4</sup> | 0.26       | 1.00        |
| <b>rs7968890 in 12p12.1</b>  |                      |                       |            |             |
| <b>Cohort</b>                | <b>Beta [95% CI]</b> | <b>P-value</b>        | <b>EAF</b> | <b>Info</b> |
| BioVU AA                     | 0.12 [-0.01, 0.24]   | 0.0743                | 0.44       | 1.00        |
| CARDIA AA                    | 0.29 [0.15, 0.44]    | 7.46x10 <sup>-5</sup> | 0.43       | 0.90        |
| BioVU EA                     | 0.16 [0.04, 0.29]    | 0.0120                | 0.44       | 1.00        |
| CARDIA EA                    | 0.14 [-0.01, 0.30]   | 0.0710                | 0.45       | 1.00        |

OR-odds ratio; CI-confidence interval; EAF-effect allele frequency.

**Supplemental Table 6. Predicted gene expression summary from MetaXcan**

| Number        |           |                |     |         |                       |                 |                       |                     |                      |
|---------------|-----------|----------------|-----|---------|-----------------------|-----------------|-----------------------|---------------------|----------------------|
| Meta-analysis | Tissue    | Gene           | Chr | Z-Score | P-value               | R <sup>2a</sup> | Variance <sup>b</sup> | N SNPs <sup>c</sup> | Model N <sup>d</sup> |
| Transethnic   | Thyroid   | <i>EDEM2</i>   | 20  | -4.51   | 6.34x10 <sup>-6</sup> | 0.148           | 0.053                 | 14                  | 24                   |
| EAs           | Pituitary | <i>C2orf73</i> | 2   | 4.45    | 8.48x10 <sup>-6</sup> | 0.342           | 0.229                 | 24                  | 25                   |

<sup>a</sup> Predicted performance R<sup>2</sup>.

<sup>b</sup> Variance of predicted gene expression.

<sup>c</sup> Number of SNPs in the prediction model that were present in the GWAS summary statistics.

<sup>d</sup> Number of SNPs in the tissue-specific gene expression prediction model using GTEx data.

**Supplemental Table 7. Examining cross phenotype associations for transethnic meta-analyses between all BioVU and CARDIA women**

| SNP        | Region  | BP          | Genes                        | $S_{Hom}$ |                       | Number<br>Z-Score | Max Dimension<br>Z-Score | Volume<br>Z-Score |
|------------|---------|-------------|------------------------------|-----------|-----------------------|-------------------|--------------------------|-------------------|
|            |         |             |                              | A2/A1     | P-value               |                   |                          |                   |
| rs200348   | 14q32.2 | 99,380,544  | <i>VRK1</i>    <i>BCL11B</i> | G/A       | $7.13 \times 10^{-7}$ | -4.26             | -3.12                    | -1.69             |
| rs11691049 | 2q24.3  | 168,615,362 | <i>B3GALT1</i>               | C/A       | $7.48 \times 10^{-7}$ | -3.83             | -3.61                    | -3.38             |

SNP-single nucleotide polymorphism; BP-base pairs; A2-effect allele; A1-reference allele.
